# Supplementary material
Source: PubMed Central journal article supplement (PMC6426696)

## Modifying a commonly expressed endocytic receptor retargets nanoparticles *in vivo*

**Figure S1.** (a) QUANT Barcode Design. (b) Comparison of Mean Fluorescent Intensity (MFI) of barcodes conjugated with Alexa-488 and Alexa-647 at 200ng and 50ng per well. \* $p < 0.05$ , \*\*\* $p < 0.001$ , 2 tailed t-test. (c) Cell types in the liver, heart, lung, spleen, and kidney were sorted based on the following FACS Markers. (d) Representative FACS gating for lung. We isolated endothelial cell (CD31<sup>+</sup>CD45<sup>-</sup>) and macrophages (CD31<sup>-</sup>CD45<sup>+</sup>CD11b<sup>+</sup>). (e) Representative FACS gating for liver. We isolated endothelial cells (CD31<sup>+</sup>CD45<sup>-</sup>), Kupffer cells (CD31<sup>-</sup>CD45<sup>+</sup>CD68<sup>+</sup>), and Hepatocytes (CD31<sup>-</sup>CD45<sup>-</sup>CD68<sup>+</sup>). (f) MFI of barcodes conjugated with Alexa-647 in wild-type and Cav1<sup>-/-</sup> mice.

a

G\*A\*T\*GCTCTCATACGAACTCGTCCNHNWCTGCTAGTCCACGTCATGTCCACCNWNHTGATATTGNWHGTGGTTAGTCGAGCAGAGAC\*T\*A\*G

Red = phosphorothioate linkages (\*) act to increase resistance to exonucleases.

Green = Universal primer binding sites allow for amplification from cells/tissues and linkage to next generation sequence adapters

Blue = Probe binding site. This functionality is used in ddPCR

Orange = 8nt Barcode. This 8nt sequence is referenced to identify nanoparticle composition and track nanoparticle distribution.

Light Blue = 4nt placer used to prevent steric blocking of universal forward primer and probe in ddPCR.

Black = Random nucleotide region used to minimize PCR bias.

N= A, T, G, or C; W= A or T; H= A, T, or C.

b

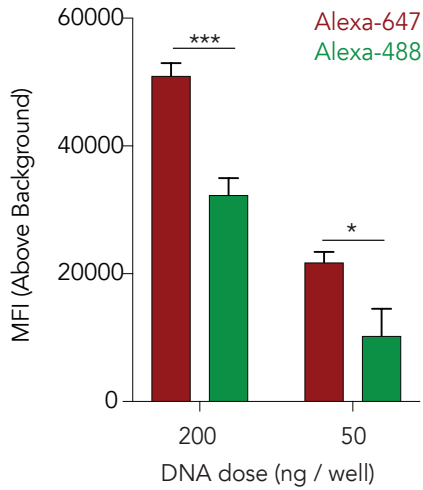

c

| Cell Type         | FACS Markers       | Tissue  |
|-------------------|--------------------|---------|
| B cells           | CD3- CD19+         | S       |
| T cells           | CD19- CD3+         | S       |
| Macrophages       | CD31- CD45+ CD11b+ | L,K     |
| Kupffer Cells     | CD31- CD45+ CD68+  | v       |
| Endothelial cells | CD31+ CD45-        | v,H,L,K |
| Immune            | CD31- CD45+ CD11b- | v,L,K   |
| Hepatocytes       | CD31- CD45-        | v       |

Liver, Heart, Lung, Spleen, Kidney

d

Representative Lung FACS Gating

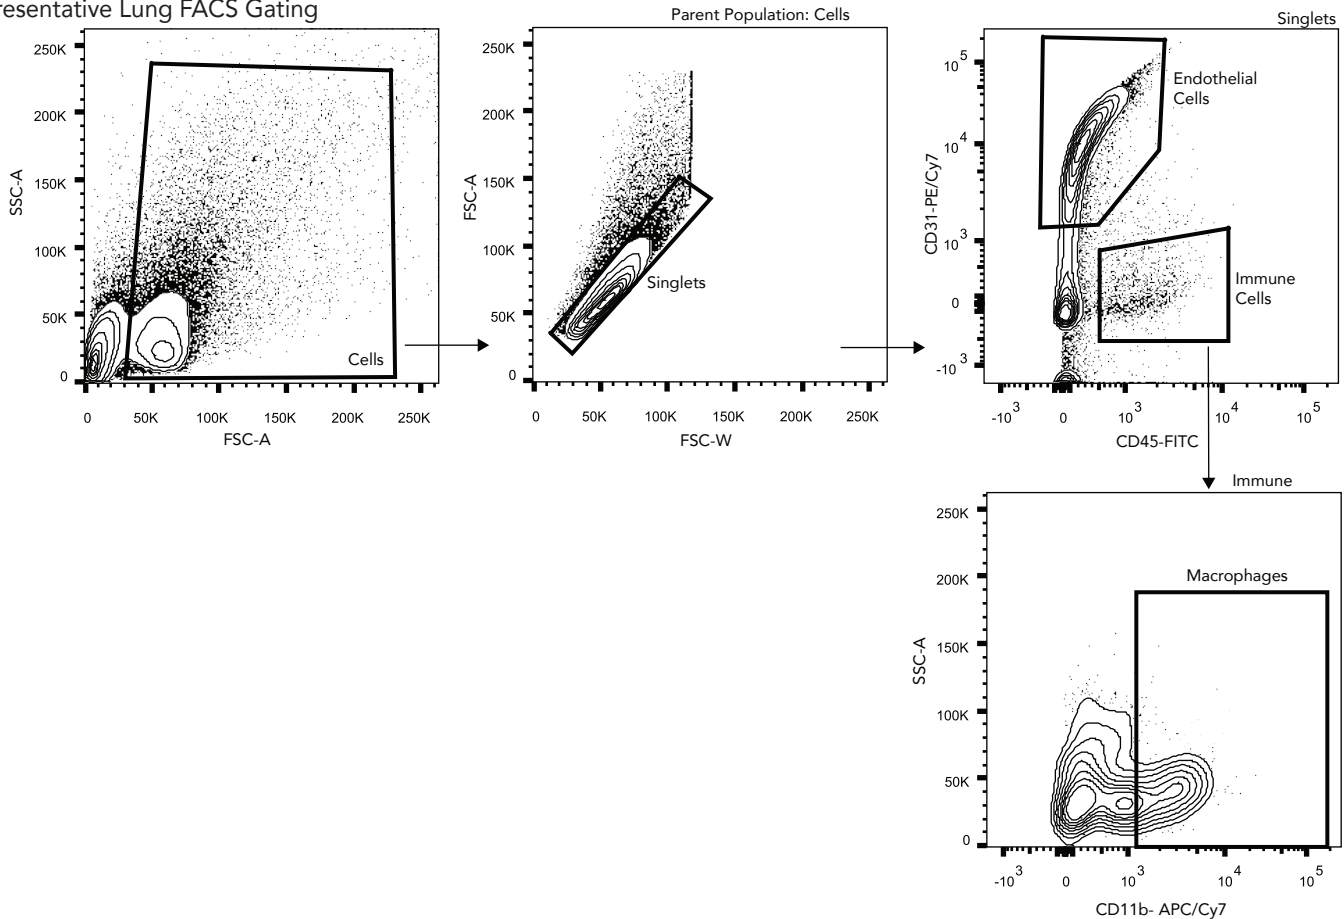

e

Representative Liver FACS Gating

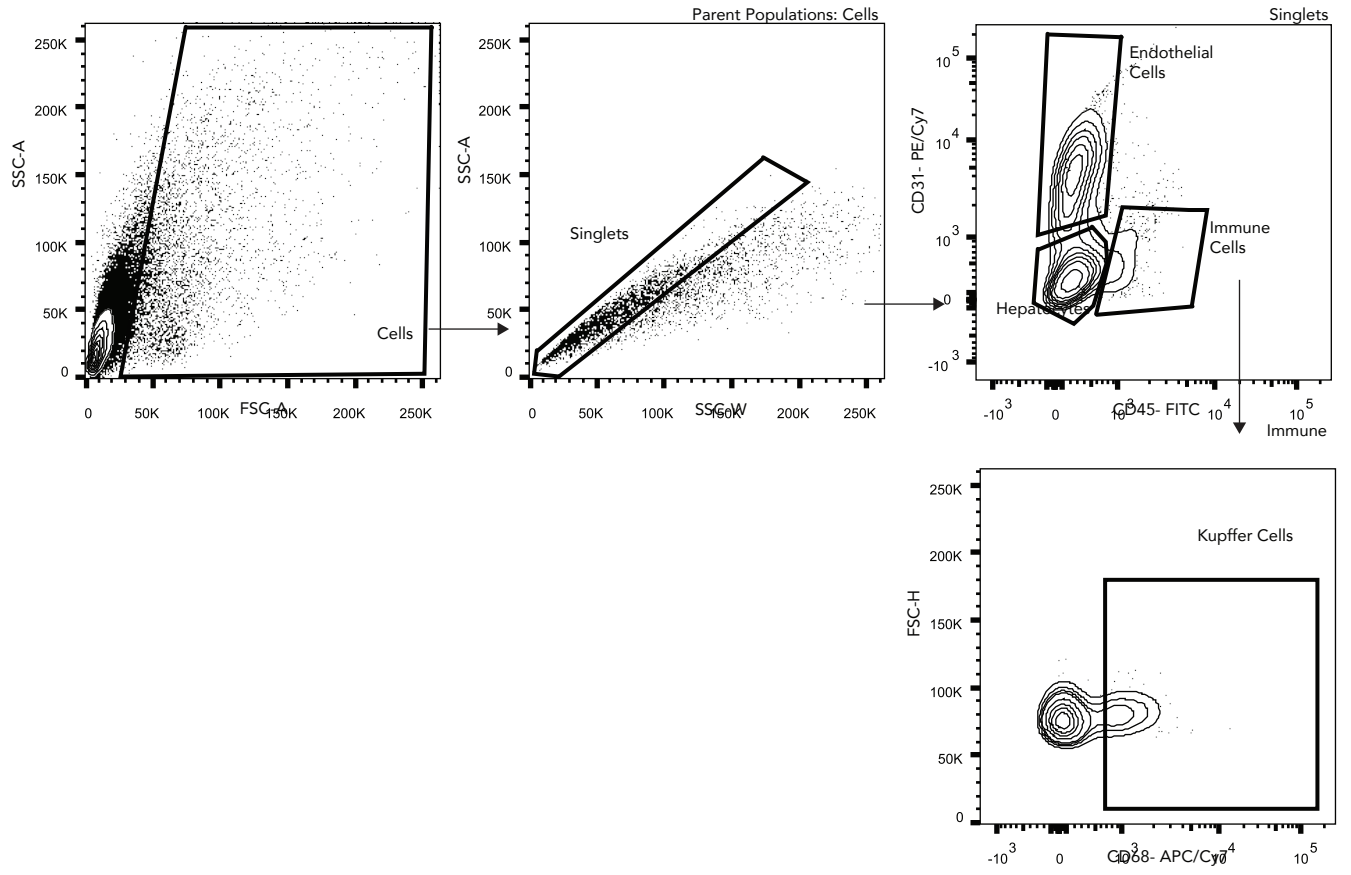

f

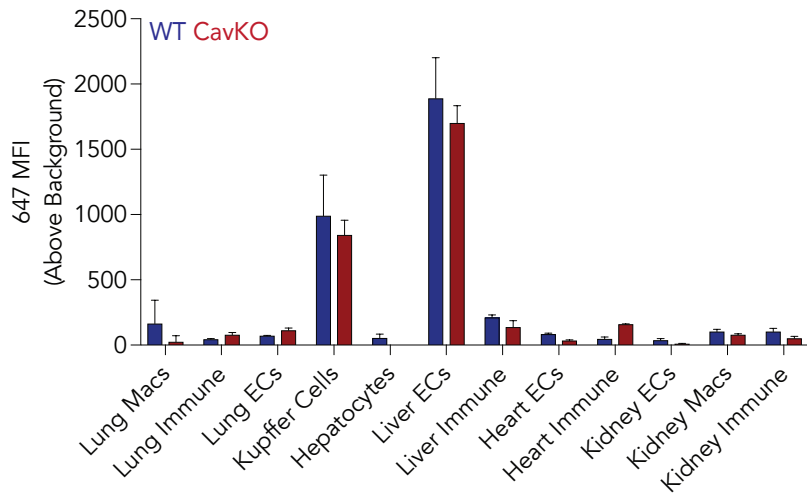

**Figure S2.** A multi-step approach to optimizing the signal generated by ddPCR QUANT barcodes. **(a)** Primer combinations were tested to avoid non-specific amplification by genomic DNA (gDNA). Different primer pairs were added to mouse and human gDNA without any barcode template. **(b)** Primers that did not amplify gDNA were selected. **(c)** A two-step PCR adds Illumina nextera chemistry regions, indices, and Illumina adapters for Illumina sequencing and **(d)** produces a clear product. **(e)** Dual indices allow for multiplexed Illumina sequencing. **(f)** ddPCR was optimized using an annealing temperature of 60°C and **(g)** probe concentration 2x more than the ddPCR standard protocol concentration. **(h)** A scrambled probe site was tested to verify the specificity of the probe-based signal.



a

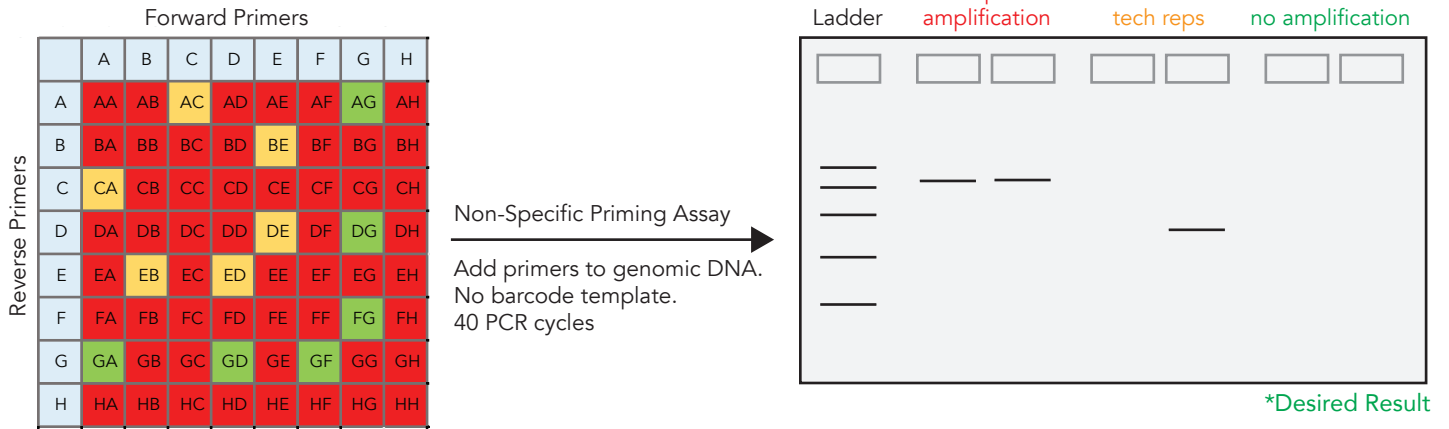

b

|   |                       |                |
|---|-----------------------|----------------|
| A | GCACGCCTTACGACTCATCT  |                |
| B | GCTCAATACTGTTCCACCGC  |                |
| C | ACTCACTTCGCATTAGCCGC  |                |
| D | GCTCTCATACGAACTCGTCC  | Forward Primer |
| E | GCACACCGCTCTTCTGAATCT |                |
| F | ATCTCTCGCACTCTCAACGG  |                |
| G | GTCTCTGCTCGACTAACCAC  | Reverse Primer |
| H | ATCACTCCGCACCGCTTATG  |                |

c

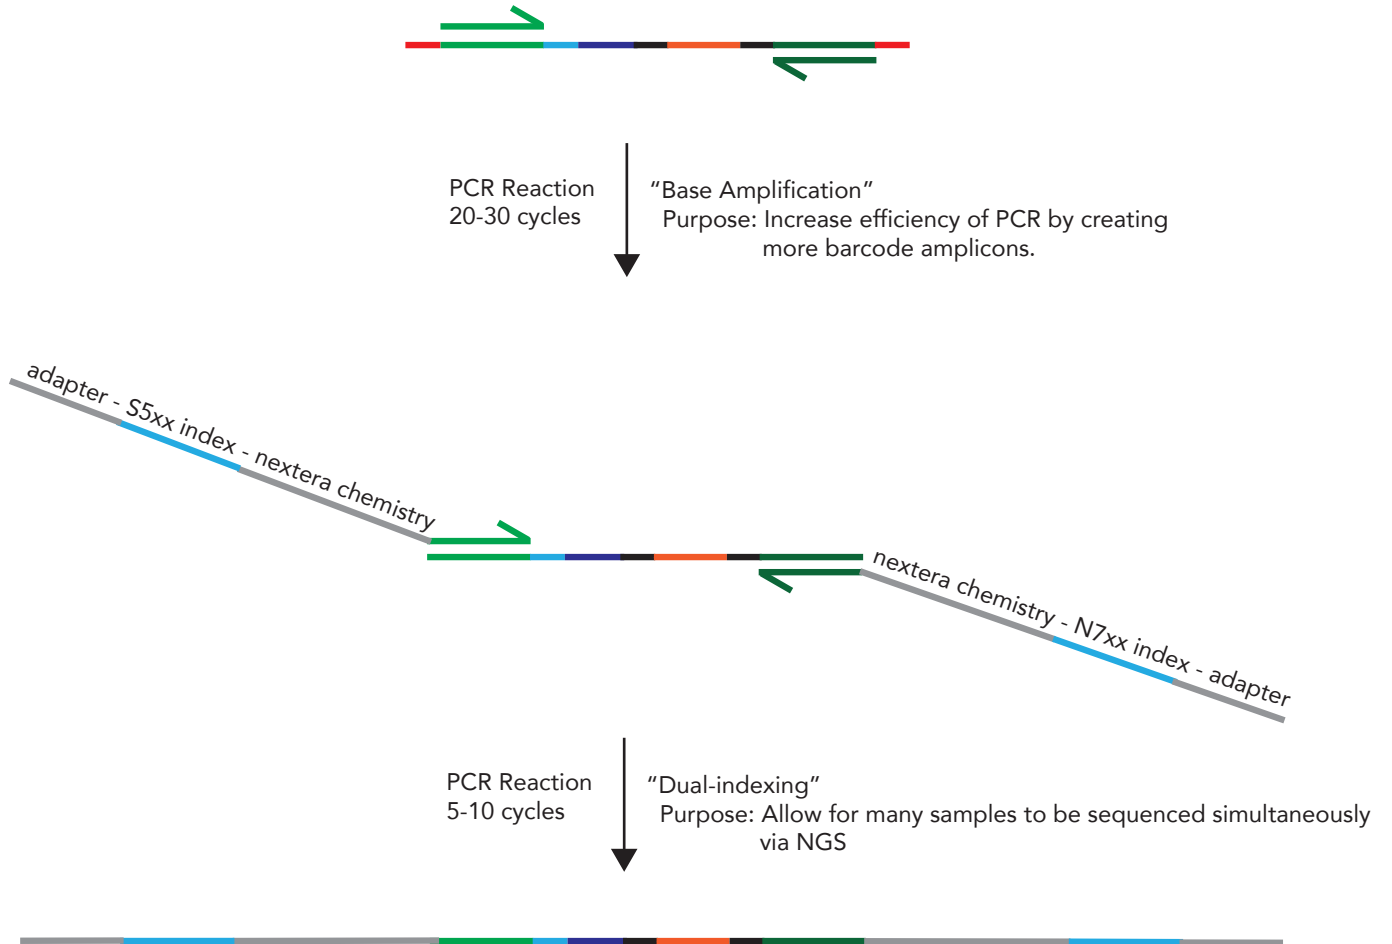

d

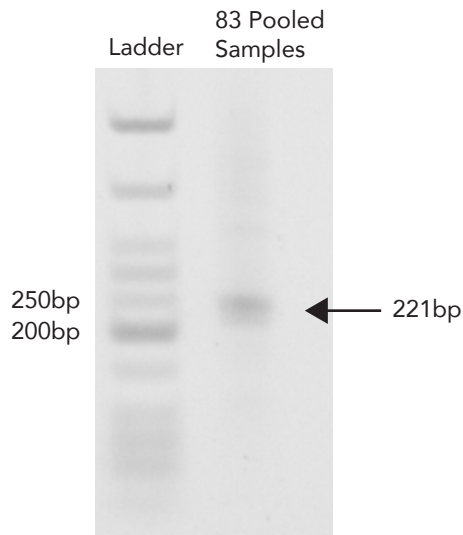

e

|      |          |      |          |
|------|----------|------|----------|
| N701 | TCGCCTTA | S502 | CTCTCTAT |
| N702 | CTAGTACG | S503 | TATCCTCT |
| N703 | TTCTGCCT | S505 | GTAAGGAG |
| N704 | GCTCAGGA | S506 | ACTGCATA |
| N705 | AGGAGTCC | S507 | AAGGAGTA |
| N706 | CATGCCTA | S508 | CTAAGCCT |
| N707 | GTAGAGAG | S510 | CGTCTAAT |
| N710 | CAGCCTCG | S511 | TCTCTCCG |
| N711 | TGCCTCTT | S513 | TCGACTAG |
| N712 | TCCTCTAC | S515 | TTCTAGCT |
| N714 | TCATGAGC | S516 | CCTAGAGT |
| N715 | CCTGAGAT | S517 | GCGTAAGA |
| N716 | TAGCGAGT |      |          |
| N718 | GTAGCTCC |      |          |
| N719 | TACTACGC |      |          |
| N720 | AGGCTCCG |      |          |

f

Annealing/Extension Temp.  
Optimization

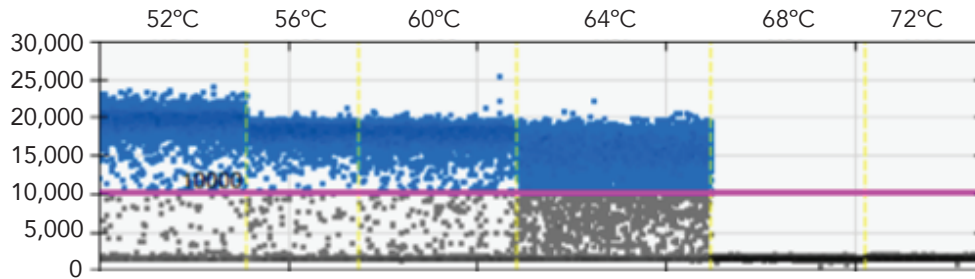

Increased risk of non-specific  
amplicon

Optimal  
Temperature

Loss of PCR Efficiency

g

Probe Concentration Optimization

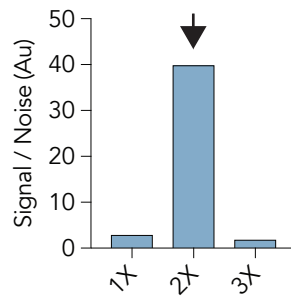

h

Scrambled Probe Site: 5'-ACCAACGCCGTATCCGTCCTCTTCCG-3'  
Correct Probe Site: 5'-CCTGCTAGTCCACGTCCATGTCCACC-3'

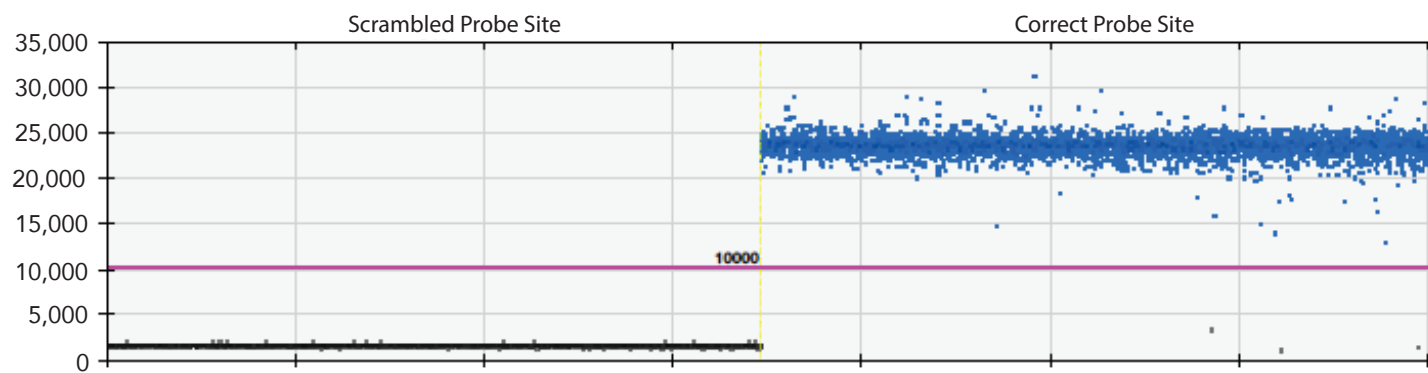

**Figure S3. (a)** Alexa-647 fluorescence 24 hours after fluorescently labeled QUANT barcodes were administered *in vitro* to iMAECs with Lipofectamine 2000 and analyzed with flow cytometry.

a

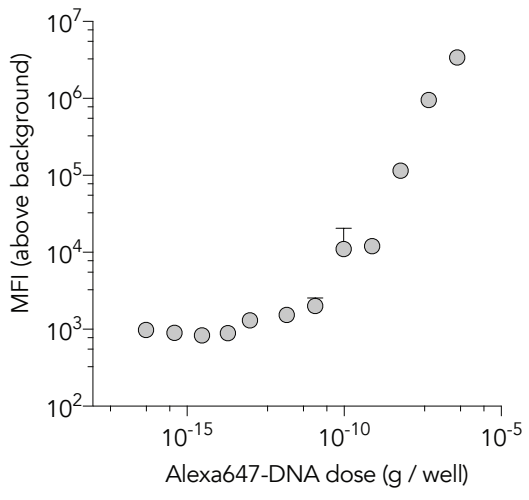

**Figure S4.** (a) 156 8-nucleotide barcode sequences were rationally selected for their ability to be multiplexed on Illumina Miniseq Machines. (b) Using dynamic light scattering (DLS), LNPs were included if they met the following inclusion criteria: autocorrelation curves with 1 inflection point and hydrodynamic diameters between 20 nm and 200 nm. (c) Average normalized delivery of each LNP from library 2. (d) In all samples of library 2, naked barcode – the negative control – was delivered less efficiently than barcodes carried by LNPs, as expected. (e) The following example illustrates how our deep sequencing data was normalized. (f) Cells were sorted on the indicated FACS markers. (g) LNPs libraries for screens 1 and 2 were synthesized with the LNP 7C1, Cholesterol, DSPC, and variable PEG compounds at variable molar ratios. (h) The formulation ratios and diameter of each LNP for screen 1. (i) Nanoparticle formulation ratios for screen 2; in this screen, we formulated 120 different LNPs. (j) Stable LNPs with diameters between 20 and 200 nm were included. (k) The formulation ratios and diameter of each LNP for screen 2.

a

G\*A\*T\*GCTCTCATACGAAGCTCGTCCNH~~W~~CCTGCTAGTCCACGTCCATGTCCACCNWNH-8nt Barcode Seq-NWHGTGGTTAGTCGAGCAGAGAC\*T\*A\*G

| BC # | Seq      |
|------|----------|------|----------|------|----------|------|----------|
| 1    | TGATATTG | 40   | TCTAACTG | 79   | ATCAATTG | 118  | CGCTTAAC |
| 2    | GACGCAAT | 41   | TATGCCTT | 80   | GGTCGGTC | 119  | CTGACCGC |
| 3    | GCGAGTAT | 42   | GTAATTGC | 81   | TTGGATCC | 120  | TGACCAGG |
| 4    | ACCTAATC | 43   | GTCTCCGT | 82   | ATTGGTTC | 121  | CTCATAGG |
| 5    | AGGCGCTA | 44   | TGCATGGT | 83   | GATGGCCT | 122  | CCGTAAGC |
| 6    | GATCTACC | 45   | AGTCCGGT | 84   | TTATAGCA | 123  | CGAGACGT |
| 7    | CTACTGAT | 46   | TCCTGATG | 85   | GTCAATCT | 124  | GACGATAA |
| 8    | TGATCTAT | 47   | ATCGTCTA | 86   | CGCTCCGG | 125  | CCGCTGCT |
| 9    | ATGAGATG | 48   | GGACGTCC | 87   | ACTCAAGT | 126  | GGTTAGAA |
| 10   | GCGAATTC | 49   | CTACGAGG | 88   | CCGTTCCG | 127  | TTATCCGG |
| 11   | GATTCCGG | 50   | CAATCCGT | 89   | CCGCAGAG | 128  | AGTAGGTA |
| 12   | ATAATATA | 51   | GCGCCTTG | 90   | CGGTATCT | 129  | CGTACTAC |
| 13   | AGCATGCG | 52   | GTCCGTTA | 91   | TTATTAAT | 130  | AACTAGCG |
| 14   | GATTCAAC | 53   | GCCTCTCG | 92   | AGGTCAT  | 131  | TGCTCCTT |
| 15   | TACCTGCT | 54   | GAGAGTTG | 93   | TAGTACGT | 132  | TCGCCAAC |
| 16   | GCTAATCG | 55   | CATAATAG | 94   | AATATACG | 133  | CGCGGCTC |
| 17   | CTCCTTCG | 56   | TCTAGAGT | 95   | CGATGCTT | 134  | AAGGCGGT |
| 18   | ACGCTAGC | 57   | AAGTCTAG | 96   | CCAAGATT | 135  | GTAATGAG |
| 19   | GCAGGACT | 58   | ATTCGAGA | 97   | TCCATTAT | 136  | AGATACTA |
| 20   | ATTGCTCT | 59   | CTACCATT | 98   | AATACCAT | 137  | GAATCGTC |
| 21   | TACGCTCG | 60   | GTTAGTCA | 99   | CTGCGACC | 138  | AGGAAGAG |
| 22   | ACGCTCCA | 61   | ATAGAATC | 100  | GACTTGAG | 139  | CAGGTACC |
| 23   | CGGTCAAT | 62   | CTCAACTA | 101  | CAGAAGCA | 140  | TAGATAGC |
| 24   | CGCCTATT | 63   | CTTACGTC | 102  | TCTCCTAA | 141  | AGAGTAAG |
| 25   | TTGCGTTG | 64   | TGAGTTCG | 103  | CTGAGCCA | 142  | TCATTCCG |
| 26   | TCCTAAGA | 65   | ATGGTAGA | 104  | TCCTGCGC | 143  | CGGCGTCG |
| 27   | CAAGAAGG | 66   | TCCAGGCG | 105  | CGAACGCC | 144  | ATCAAGCA |
| 28   | TAGAATTA | 67   | CTCAGCAT | 106  | CTGCTCTA | 145  | TTGGCGTA |
| 29   | GCGCCAA  | 68   | TGCGTATA | 107  | GCCTACCA | 146  | CGTCCGCA |
| 30   | TAGATCCG | 69   | AATGCTAC | 108  | GGATGAAG | 147  | AGGACCGA |
| 31   | CGAGCAGC | 70   | CGCGAGGC | 109  | CTATATAC | 148  | CCTCGATC |
| 32   | TAAGATGA | 71   | GTCGAAGT | 110  | CGAATATG | 149  | TATCTGAG |
| 33   | AGCTCGGA | 72   | ACTATCTC | 111  | ACGCATTA | 150  | CGGAGTAA |
| 34   | TAACCGAA | 73   | GTCGCCTC | 112  | GGTAGACC | 151  | AGAATGAA |
| 35   | TATATCTA | 74   | AGTTACCG | 113  | CGTTATGC | 152  | AATCGGTT |
| 36   | AAGAGGAT | 75   | GAGTATAC | 114  | TCTGCGGA | 153  | CATCGCCA |
| 37   | ACGTCGAA | 76   | GGCAGTAG | 115  | CCTTGCAT | 154  | TATTGACT |
| 38   | CATCATTA | 77   | TGGAGACG | 116  | ATTATAGT | 155  | GTAGGCGG |
| 39   | TTGCAACT | 78   | ATTAGGAC | 117  | CTCGTAAT | 156  | GTTCGTAT |

b

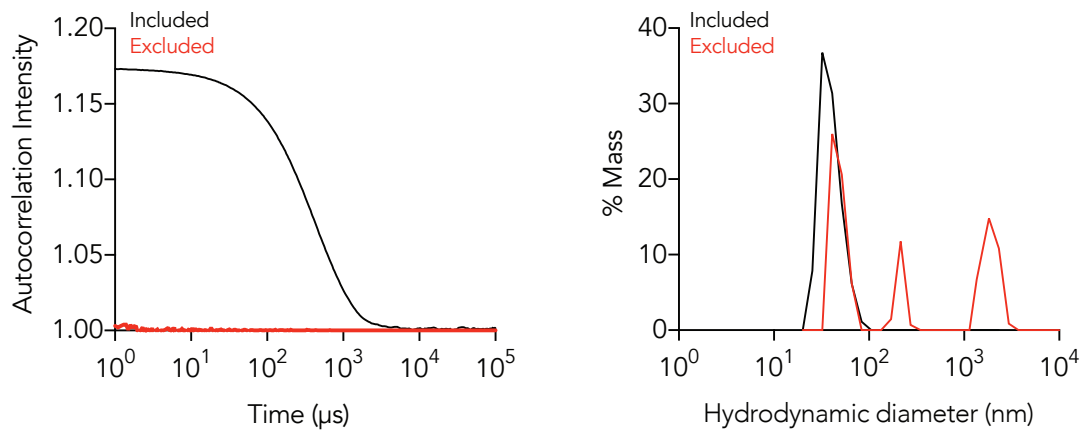

c

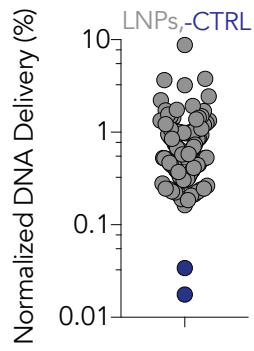

d

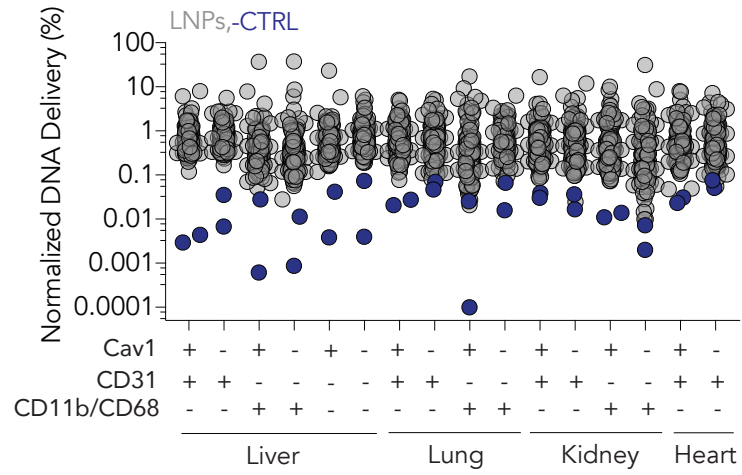



e

|                     |          | Raw Counts Lung Endothelial Cells |         |         | Raw Counts Kidney Endothelial Cells |         |         |       |
|---------------------|----------|-----------------------------------|---------|---------|-------------------------------------|---------|---------|-------|
| LNP                 | Barcode  | Mouse 1                           | Mouse 2 | Mouse 3 | Mouse 1                             | Mouse 2 | Mouse 3 | Input |
| 1                   | GACACAGT | 100                               | 80      | 200     | 300                                 | 200     | 250     | 100   |
| 2                   | GCATAACG | 50                                | 45      | 110     | 100                                 | 60      | 70      | 120   |
| 3                   | ACAGAGGT | 120                               | 105     | 250     | 150                                 | 90      | 110     | 110   |
| <b>Total Counts</b> |          | 270                               | 230     | 560     | 550                                 | 350     | 430     | 330   |

  

|                  |          | Normalized Counts Lung ECs (%) |         |         | Normalized Counts Kidney ECs (%) |         |         |       |
|------------------|----------|--------------------------------|---------|---------|----------------------------------|---------|---------|-------|
| LNP              | Barcode  | Mouse 1                        | Mouse 2 | Mouse 3 | Mouse 1                          | Mouse 2 | Mouse 3 | Input |
| 1                | GACACAGT | 37                             | 35      | 36      | 55                               | 57      | 58      | 30    |
| 2                | GCATAACG | 19                             | 20      | 20      | 18                               | 17      | 16      | 36    |
| 3                | ACAGAGGT | 44                             | 46      | 45      | 27                               | 26      | 26      | 33    |
| <b>Total (%)</b> |          | 100                            | 100     | 100     | 100                              | 100     | 100     | 100   |

  

|                  |          | Normalized to input Counts Lung ECs (%) |         |         | Normalized to input Counts Kidney ECs (%) |         |         |  |
|------------------|----------|-----------------------------------------|---------|---------|-------------------------------------------|---------|---------|--|
| LNP              | Barcode  | Mouse 1                                 | Mouse 2 | Mouse 3 | Mouse 1                                   | Mouse 2 | Mouse 3 |  |
| 1                | GACACAGT | 40                                      | 38      | 39      | 58                                        | 60      | 61      |  |
| 2                | GCATAACG | 17                                      | 18      | 18      | 16                                        | 15      | 14      |  |
| 3                | ACAGAGGT | 44                                      | 45      | 44      | 26                                        | 25      | 24      |  |
| <b>Total (%)</b> |          | 100                                     | 100     | 100     | 100                                       | 100     | 100     |  |

f

| Cell Type         | FACS Markers       | Tissue            |
|-------------------|--------------------|-------------------|
| Endothelial cells | CD31+ CD45-        | <i>v, H, L, K</i> |
| Macrophages       | CD31-CD45+CD11b+   | <i>L,K</i>        |
| Kupffer Cells     | CD31- CD45+ CD68+  | <i>v</i>          |
| Immune Cells      | CD31- CD45+ CD11b- | <i>L,K</i>        |
| Hepatocytes       | CD31- CD45- CD68-  | <i>v</i>          |

Liver, **H**eat, Lung, **K**idney

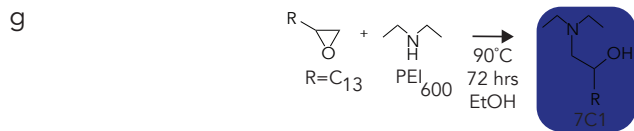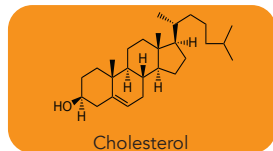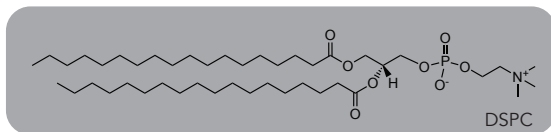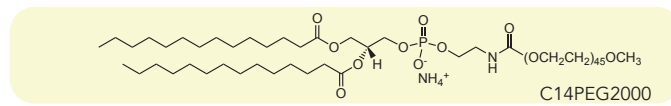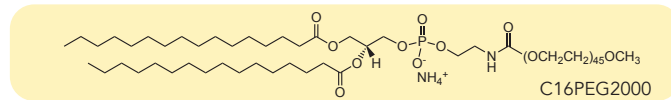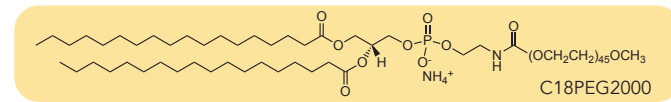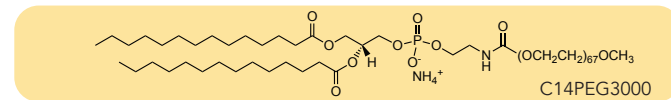

h

Library 1: 128 LNPs (4 PEG-lipids)

| Number | Lipomer Type | Chol Type | PEG Tail | PEG MW | HL Type | Lipomer % | Chol % | PEG % | HL % | Diameter (nm) |
|--------|--------------|-----------|----------|--------|---------|-----------|--------|-------|------|---------------|
| 1      | 7C1          | Chol      | C14PEG   | 2000   | DSPC    | 35        | 44     | 1     | 20   | 110           |
| 2      | 7C1          | Chol      | C14PEG   | 2000   | DSPC    | 35        | 42     | 3     | 20   | 21            |
| 3      | 7C1          | Chol      | C14PEG   | 2000   | DSPC    | 35        | 40     | 5     | 20   | 41            |
| 4      | 7C1          | Chol      | C14PEG   | 2000   | DSPC    | 35        | 38     | 7     | 20   | 46            |
| 5      | 7C1          | Chol      | C14PEG   | 2000   | DSPC    | 35        | 36     | 9     | 20   | 26            |
| 6      | 7C1          | Chol      | C14PEG   | 2000   | DSPC    | 35        | 34     | 11    | 20   | 16            |
| 7      | 7C1          | Chol      | C14PEG   | 2000   | DSPC    | 35        | 32     | 13    | 20   | 25            |
| 8      | 7C1          | Chol      | C14PEG   | 2000   | DSPC    | 35        | 30     | 15    | 20   | 15.2          |
| 9      | 7C1          | Chol      | C14PEG   | 2000   | DSPC    | 50        | 34     | 1     | 15   | 110           |
| 10     | 7C1          | Chol      | C14PEG   | 2000   | DSPC    | 50        | 32     | 3     | 15   | 143           |
| 11     | 7C1          | Chol      | C14PEG   | 2000   | DSPC    | 50        | 30     | 5     | 15   | 60            |
| 12     | 7C1          | Chol      | C14PEG   | 2000   | DSPC    | 50        | 28     | 7     | 15   | 62            |
| 13     | 7C1          | Chol      | C14PEG   | 2000   | DSPC    | 50        | 26     | 9     | 15   | 37            |
| 14     | 7C1          | Chol      | C14PEG   | 2000   | DSPC    | 50        | 24     | 11    | 15   | 50            |
| 15     | 7C1          | Chol      | C14PEG   | 2000   | DSPC    | 50        | 22     | 13    | 15   | 48            |
| 16     | 7C1          | Chol      | C14PEG   | 2000   | DSPC    | 50        | 20     | 15    | 15   | 59            |
| 17     | 7C1          | Chol      | C14PEG   | 2000   | DSPC    | 35        | 44     | 1     | 20   | 68            |
| 18     | 7C1          | Chol      | C14PEG   | 2000   | DSPC    | 35        | 42     | 3     | 20   | 48            |
| 19     | 7C1          | Chol      | C14PEG   | 2000   | DSPC    | 35        | 40     | 5     | 20   | 31            |
| 20     | 7C1          | Chol      | C14PEG   | 2000   | DSPC    | 35        | 38     | 7     | 20   | 47            |
| 21     | 7C1          | Chol      | C14PEG   | 2000   | DSPC    | 35        | 36     | 9     | 20   | 36            |
| 22     | 7C1          | Chol      | C14PEG   | 2000   | DSPC    | 35        | 34     | 11    | 20   | 54            |
| 23     | 7C1          | Chol      | C14PEG   | 2000   | DSPC    | 35        | 32     | 13    | 20   | 34            |
| 24     | 7C1          | Chol      | C14PEG   | 2000   | DSPC    | 35        | 30     | 15    | 20   | 39            |
| 25     | 7C1          | Chol      | C14PEG   | 2000   | DSPC    | 50        | 34     | 1     | 15   | 59            |
| 26     | 7C1          | Chol      | C14PEG   | 2000   | DSPC    | 50        | 32     | 3     | 15   | 88            |
| 27     | 7C1          | Chol      | C14PEG   | 2000   | DSPC    | 50        | 30     | 5     | 15   | 55            |
| 28     | 7C1          | Chol      | C14PEG   | 2000   | DSPC    | 50        | 28     | 7     | 15   | 61            |
| 29     | 7C1          | Chol      | C14PEG   | 2000   | DSPC    | 50        | 26     | 9     | 15   | 27            |
| 30     | 7C1          | Chol      | C14PEG   | 2000   | DSPC    | 50        | 24     | 11    | 15   | 36            |
| 31     | 7C1          | Chol      | C14PEG   | 2000   | DSPC    | 50        | 22     | 13    | 15   | 49            |
| 32     | 7C1          | Chol      | C14PEG   | 2000   | DSPC    | 50        | 20     | 15    | 15   | 47            |
| 33     | 7C1          | Chol      | C18PEG   | 2000   | DSPC    | 35        | 44     | 1     | 20   | 92            |
| 34     | 7C1          | Chol      | C18PEG   | 2000   | DSPC    | 35        | 42     | 3     | 20   | 29            |
| 35     | 7C1          | Chol      | C18PEG   | 2000   | DSPC    | 35        | 40     | 5     | 20   | 55.5          |
| 36     | 7C1          | Chol      | C18PEG   | 2000   | DSPC    | 35        | 38     | 7     | 20   | 140           |
| 37     | 7C1          | Chol      | C18PEG   | 2000   | DSPC    | 35        | 36     | 9     | 20   | 32            |
| 38     | 7C1          | Chol      | C18PEG   | 2000   | DSPC    | 35        | 34     | 11    | 20   | 35            |
| 39     | 7C1          | Chol      | C18PEG   | 2000   | DSPC    | 35        | 32     | 13    | 20   | 46            |
| 40     | 7C1          | Chol      | C18PEG   | 2000   | DSPC    | 35        | 30     | 15    | 20   | 83            |
| 41     | 7C1          | Chol      | C18PEG   | 2000   | DSPC    | 50        | 34     | 1     | 15   | 39            |
| 42     | 7C1          | Chol      | C18PEG   | 2000   | DSPC    | 50        | 32     | 3     | 15   | 110           |
| 43     | 7C1          | Chol      | C18PEG   | 2000   | DSPC    | 50        | 30     | 5     | 15   | 60            |
| 44     | 7C1          | Chol      | C18PEG   | 2000   | DSPC    | 50        | 28     | 7     | 15   | 53            |
| 45     | 7C1          | Chol      | C18PEG   | 2000   | DSPC    | 50        | 26     | 9     | 15   | 53            |
| 46     | 7C1          | Chol      | C18PEG   | 2000   | DSPC    | 50        | 24     | 11    | 15   | 56            |
| 47     | 7C1          | Chol      | C18PEG   | 2000   | DSPC    | 50        | 22     | 13    | 15   | 46            |
| 48     | 7C1          | Chol      | C18PEG   | 2000   | DSPC    | 50        | 20     | 15    | 15   | 43            |
| 49     | 7C1          | Chol      | C14PEG   | 3000   | DSPC    | 35        | 44     | 1     | 20   | 51            |
| 50     | 7C1          | Chol      | C14PEG   | 3000   | DSPC    | 35        | 42     | 3     | 20   | 47            |
| 51     | 7C1          | Chol      | C14PEG   | 3000   | DSPC    | 35        | 40     | 5     | 20   | 39            |
| 52     | 7C1          | Chol      | C14PEG   | 3000   | DSPC    | 35        | 38     | 7     | 20   | 78            |
| 53     | 7C1          | Chol      | C14PEG   | 3000   | DSPC    | 35        | 36     | 9     | 20   | 288           |
| 54     | 7C1          | Chol      | C14PEG   | 3000   | DSPC    | 35        | 34     | 11    | 20   | 15            |
| 55     | 7C1          | Chol      | C14PEG   | 3000   | DSPC    | 35        | 32     | 13    | 20   | 31            |
| 56     | 7C1          | Chol      | C14PEG   | 3000   | DSPC    | 35        | 30     | 15    | 20   | 76            |
| 57     | 7C1          | Chol      | C14PEG   | 3000   | DSPC    | 50        | 34     | 1     | 15   | 55            |
| 58     | 7C1          | Chol      | C14PEG   | 3000   | DSPC    | 50        | 32     | 3     | 15   | 21            |
| 59     | 7C1          | Chol      | C14PEG   | 3000   | DSPC    | 50        | 30     | 5     | 15   | 46            |
| 60     | 7C1          | Chol      | C14PEG   | 3000   | DSPC    | 50        | 28     | 7     | 15   | 29            |
| 61     | 7C1          | Chol      | C14PEG   | 3000   | DSPC    | 50        | 26     | 9     | 15   | 101           |
| 62     | 7C1          | Chol      | C14PEG   | 3000   | DSPC    | 50        | 24     | 11    | 15   | 108           |
| 63     | 7C1          | Chol      | C14PEG   | 3000   | DSPC    | 50        | 22     | 13    | 15   | 66            |
| 64     | 7C1          | Chol      | C14PEG   | 3000   | DSPC    | 50        | 20     | 15    | 15   | 66            |

| Number | Lipomer Type | Chol Type | PEG Tail | PEG MW | HL Type | Lipomer % | Chol % | PEG % | HL % | Diameter (nm) |
|--------|--------------|-----------|----------|--------|---------|-----------|--------|-------|------|---------------|
| 65     | 7C1          | Chol      | C14PEG   | 2000   | DSPC    | 65        | 24     | 1     | 10   | 13            |
| 66     | 7C1          | Chol      | C14PEG   | 2000   | DSPC    | 65        | 22     | 3     | 10   | 55            |
| 67     | 7C1          | Chol      | C14PEG   | 2000   | DSPC    | 65        | 20     | 5     | 10   | 720           |
| 68     | 7C1          | Chol      | C14PEG   | 2000   | DSPC    | 65        | 18     | 7     | 10   | 287           |
| 69     | 7C1          | Chol      | C14PEG   | 2000   | DSPC    | 65        | 16     | 9     | 10   | 67            |
| 70     | 7C1          | Chol      | C14PEG   | 2000   | DSPC    | 65        | 14     | 11    | 10   | 77            |
| 71     | 7C1          | Chol      | C14PEG   | 2000   | DSPC    | 65        | 12     | 13    | 10   | 160           |
| 72     | 7C1          | Chol      | C14PEG   | 2000   | DSPC    | 65        | 10     | 15    | 10   | 35            |
| 73     | 7C1          | Chol      | C14PEG   | 2000   | DSPC    | 80        | 14     | 1     | 5    | 100           |
| 74     | 7C1          | Chol      | C14PEG   | 2000   | DSPC    | 80        | 12     | 3     | 5    | 69            |
| 75     | 7C1          | Chol      | C14PEG   | 2000   | DSPC    | 80        | 10     | 5     | 5    | 57            |
| 76     | 7C1          | Chol      | C14PEG   | 2000   | DSPC    | 80        | 8      | 7     | 5    | 16            |
| 77     | 7C1          | Chol      | C14PEG   | 2000   | DSPC    | 80        | 6      | 9     | 5    | 66            |
| 78     | 7C1          | Chol      | C14PEG   | 2000   | DSPC    | 80        | 4      | 11    | 5    | 33            |
| 79     | 7C1          | Chol      | C14PEG   | 2000   | DSPC    | 80        | 2      | 13    | 5    | 60            |
| 80     | 7C1          | Chol      | C14PEG   | 2000   | DSPC    | 80        | 0      | 15    | 5    | 60            |
| 81     | 7C1          | Chol      | C14PEG   | 2000   | DSPC    | 65        | 24     | 1     | 10   | 25            |
| 82     | 7C1          | Chol      | C14PEG   | 2000   | DSPC    | 65        | 22     | 3     | 10   | 287           |
| 83     | 7C1          | Chol      | C14PEG   | 2000   | DSPC    | 65        | 20     | 5     | 10   | 51            |
| 84     | 7C1          | Chol      | C14PEG   | 2000   | DSPC    | 65        | 18     | 7     | 10   | 36            |
| 85     | 7C1          | Chol      | C14PEG   | 2000   | DSPC    | 65        | 16     | 9     | 10   | 66            |
| 86     | 7C1          | Chol      | C14PEG   | 2000   | DSPC    | 65        | 14     | 11    | 10   | 41            |
| 87     | 7C1          | Chol      | C14PEG   | 2000   | DSPC    | 65        | 12     | 13    | 10   | 73            |
| 88     | 7C1          | Chol      | C14PEG   | 2000   | DSPC    | 65        | 10     | 15    | 10   | 44            |
| 89     | 7C1          | Chol      | C14PEG   | 2000   | DSPC    | 80        | 14     | 1     | 5    | 66            |
| 90     | 7C1          | Chol      | C14PEG   | 2000   | DSPC    | 80        | 12     | 3     | 5    | 49            |
| 91     | 7C1          | Chol      | C14PEG   | 2000   | DSPC    | 80        | 10     | 5     | 5    | 66            |
| 92     | 7C1          | Chol      | C14PEG   | 2000   | DSPC    | 80        | 8      | 7     | 5    | 40            |
| 93     | 7C1          | Chol      | C14PEG   | 2000   | DSPC    | 80        | 6      | 9     | 5    | 67            |
| 94     | 7C1          | Chol      | C14PEG   | 2000   | DSPC    | 80        | 4      | 11    | 5    | 47            |
| 95     | 7C1          | Chol      | C14PEG   | 2000   | DSPC    | 80        | 2      | 13    | 5    | 59            |
| 96     | 7C1          | Chol      | C18PEG   | 2000   | DSPC    | 65        | 24     | 1     | 10   | 30            |
| 97     | 7C1          | Chol      | C18PEG   | 2000   | DSPC    | 65        | 22     | 3     | 10   | 38            |
| 98     | 7C1          | Chol      | C18PEG   | 2000   | DSPC    | 65        | 20     | 5     | 10   | 41            |
| 99     | 7C1          | Chol      | C18PEG   | 2000   | DSPC    | 65        | 18     | 7     | 10   | 85            |
| 100    | 7C1          | Chol      | C18PEG   | 2000   | DSPC    | 65        | 16     | 9     | 10   | 83            |
| 101    | 7C1          | Chol      | C18PEG   | 2000   | DSPC    | 65        | 14     | 11    | 10   | 83            |
| 102    | 7C1          | Chol      | C18PEG   | 2000   | DSPC    | 65        | 12     | 13    | 10   | 65            |
| 103    | 7C1          | Chol      | C18PEG   | 2000   | DSPC    | 65        | 10     | 15    | 10   | 55            |
| 104    | 7C1          | Chol      | C18PEG   | 2000   | DSPC    | 80        | 14     | 1     | 5    | 47            |
| 105    | 7C1          | Chol      | C18PEG   | 2000   | DSPC    | 80        | 12     | 3     | 5    | 53            |
| 106    | 7C1          | Chol      | C18PEG   | 2000   | DSPC    | 80        | 10     | 5     | 5    | 36            |
| 107    | 7C1          | Chol      | C18PEG   | 2000   | DSPC    | 80        | 8      | 7     | 5    | 52            |
| 108    | 7C1          | Chol      | C18PEG   | 2000   | DSPC    | 80        | 6      | 9     | 5    | 50            |
| 109    | 7C1          | Chol      | C18PEG   | 2000   | DSPC    | 80        | 4      | 11    | 5    | 26            |
| 110    | 7C1          | Chol      | C18PEG   | 2000   | DSPC    | 80        | 2      | 13    | 5    | 34            |
| 111    | 7C1          | Chol      | C18PEG   | 2000   | DSPC    | 80        | 0      | 15    | 5    | 25            |
| 112    | 7C1          | Chol      | C14PEG   | 3000   | DSPC    | 65        | 24     | 1     | 10   | 58            |
| 113    | 7C1          | Chol      | C14PEG   | 3000   | DSPC    | 65        | 22     | 3     | 10   | 46            |
| 114    | 7C1          | Chol      | C14PEG   | 3000   | DSPC    | 65        | 20     | 5     | 10   | 70            |
| 115    | 7C1          | Chol      | C14PEG   | 3000   | DSPC    | 65        | 18     | 7     | 10   | 68            |
| 116    | 7C1          | Chol      | C14PEG   | 3000   | DSPC    | 65        | 16     | 9     | 10   | 90            |
| 117    | 7C1          | Chol      | C14PEG   | 3000   | DSPC    | 65        | 14     | 11    | 10   | 61            |
| 118    | 7C1          | Chol      | C14PEG   | 3000   | DSPC    | 65        | 12     | 13    | 10   | 34            |
| 119    | 7C1          | Chol      | C14PEG   | 3000   | DSPC    | 65        | 10     | 15    | 10   | 52            |
| 120    | 7C1          | Chol      | C14PEG   | 3000   | DSPC    | 80        | 14     | 1     | 5    | 57            |
| 121    | 7C1          | Chol      | C14PEG   | 3000   | DSPC    | 80        | 12     | 3     | 5    | 67            |
| 122    | 7C1          | Chol      | C14PEG   | 3000   | DSPC    | 80        | 10     | 5     | 5    | 46            |
| 123    | 7C1          | Chol      | C14PEG   | 3000   | DSPC    | 80        | 8      | 7     | 5    | 47            |
| 124    | 7C1          | Chol      | C14PEG   | 3000   | DSPC    | 80        | 6      | 9     | 5    | 44            |
| 125    | 7C1          | Chol      | C14PEG   | 3000   | DSPC    | 80        | 4      | 11    | 5    | 48            |
| 126    | 7C1          | Chol      | C14PEG   | 3000   | DSPC    | 80        | 2      | 13    | 5    | 43            |
| 127    | 7C1          | Chol      | C14PEG   | 3000   | DSPC    | 80        | 0      | 15    | 5    | 36            |

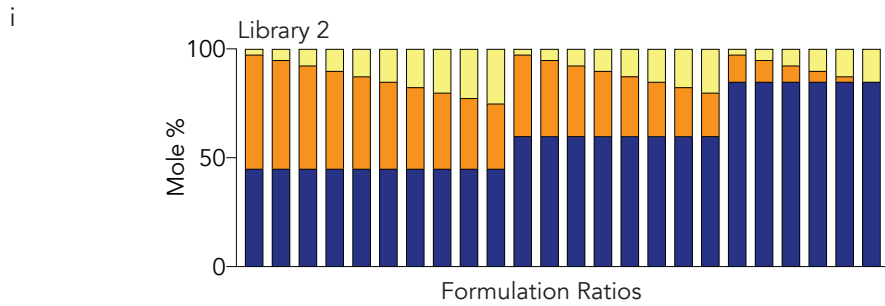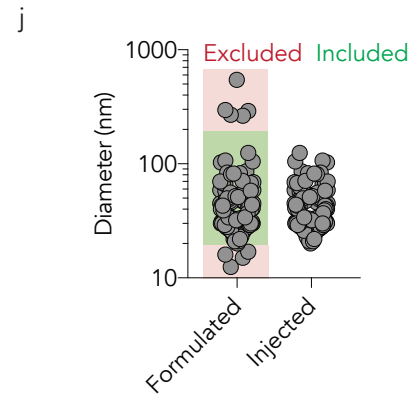

k

| LNP # | Lipomer Type | Chol Type | PEG Alkyl | PEG MW | Lipomer Mole % | Chol Mole % | PEG Mole % | Diameter (nm) | LNP # | Lipomer Type | Chol Type | PEG Alkyl | PEG MW | Lipomer Mole % | Chol Mole % | PEG Mole % | Diameter (nm) |
|-------|--------------|-----------|-----------|--------|----------------|-------------|------------|---------------|-------|--------------|-----------|-----------|--------|----------------|-------------|------------|---------------|
| 1     | 7C1          | CHOL      | C14       | 2000   | 60             | 37.5        | 2.5        | 50            | 61    | 7C1          | CHOL      | C18       | 2000   | 45             | 42.5        | 12.5       | 30            |
| 2     | 7C1          | CHOL      | C14       | 2000   | 60             | 35          | 5          | 55            | 62    | 7C1          | CHOL      | C18       | 2000   | 45             | 40          | 15         | 29            |
| 3     | 7C1          | CHOL      | C14       | 2000   | 60             | 32.5        | 7.5        | 290           | 63    | 7C1          | CHOL      | C18       | 2000   | 45             | 37.5        | 17.5       | 40            |
| 4     | 7C1          | CHOL      | C14       | 2000   | 60             | 30          | 10         | 27            | 64    | 7C1          | CHOL      | C18       | 2000   | 45             | 35          | 20         | 84            |
| 5     | 7C1          | CHOL      | C14       | 2000   | 60             | 27.5        | 12.5       | 47            | 65    | 7C1          | CHOL      | C18       | 2000   | 45             | 32.5        | 22.5       | 32            |
| 6     | 7C1          | CHOL      | C14       | 2000   | 60             | 25          | 15         | 31            | 66    | 7C1          | CHOL      | C18       | 2000   | 45             | 30          | 25         | 68            |
| 7     | 7C1          | CHOL      | C14       | 2000   | 60             | 22.5        | 17.5       | 103           | 67    | 7C1          | CHOL      | C18       | 2000   | 85             | 12.5        | 2.5        | 69            |
| 8     | 7C1          | CHOL      | C14       | 2000   | 60             | 20          | 20         | 58            | 68    | 7C1          | CHOL      | C18       | 2000   | 85             | 10          | 5          | 17            |
| 9     | 7C1          | CHOL      | C14       | 2000   | 45             | 52.5        | 2.5        | 40            | 69    | 7C1          | CHOL      | C18       | 2000   | 85             | 7.5         | 7.5        | 21            |
| 10    | 7C1          | CHOL      | C14       | 2000   | 45             | 50          | 5          | 59            | 70    | 7C1          | CHOL      | C18       | 2000   | 85             | 5           | 10         | 20            |
| 11    | 7C1          | CHOL      | C14       | 2000   | 45             | 47.5        | 7.5        | 12.5          | 71    | 7C1          | CHOL      | C18       | 2000   | 85             | 2.5         | 12.5       | 83            |
| 12    | 7C1          | CHOL      | C14       | 2000   | 45             | 45          | 10         | 107           | 72    | 7C1          | CHOL      | C18       | 2000   | 85             | 0           | 15         | 33            |
| 13    | 7C1          | CHOL      | C14       | 2000   | 45             | 42.5        | 12.5       | 27            | 73    | 7C1          | CHOL      | C14       | 3000   | 60             | 37.5        | 2.5        | 30            |
| 14    | 7C1          | CHOL      | C14       | 2000   | 45             | 40          | 15         | 45            | 74    | 7C1          | CHOL      | C14       | 3000   | 60             | 35          | 5          | 21            |
| 15    | 7C1          | CHOL      | C14       | 2000   | 45             | 37.5        | 17.5       | 28            | 75    | 7C1          | CHOL      | C14       | 3000   | 60             | 32.5        | 7.5        | 42            |
| 16    | 7C1          | CHOL      | C14       | 2000   | 45             | 35          | 20         | 56            | 76    | 7C1          | CHOL      | C14       | 3000   | 60             | 30          | 10         | 35            |
| 17    | 7C1          | CHOL      | C14       | 2000   | 45             | 32.5        | 22.5       | 26            | 77    | 7C1          | CHOL      | C14       | 3000   | 60             | 27.5        | 12.5       | 26            |
| 18    | 7C1          | CHOL      | C14       | 2000   | 45             | 30          | 25         | 31            | 78    | 7C1          | CHOL      | C14       | 3000   | 60             | 25          | 15         | 56            |
| 19    | 7C1          | CHOL      | C14       | 2000   | 85             | 12.5        | 2.5        | 42            | 79    | 7C1          | CHOL      | C14       | 3000   | 60             | 22.5        | 17.5       | 70            |
| 20    | 7C1          | CHOL      | C14       | 2000   | 85             | 10          | 5          | 45            | 80    | 7C1          | CHOL      | C14       | 3000   | 60             | 20          | 20         | 30            |
| 21    | 7C1          | CHOL      | C14       | 2000   | 85             | 7.5         | 7.5        | 43            | 81    | 7C1          | CHOL      | C14       | 3000   | 45             | 52.5        | 2.5        | 50            |
| 22    | 7C1          | CHOL      | C14       | 2000   | 85             | 5           | 10         | 57            | 82    | 7C1          | CHOL      | C14       | 3000   | 45             | 50          | 5          | 68            |
| 23    | 7C1          | CHOL      | C14       | 2000   | 85             | 2.5         | 12.5       | 15            | 83    | 7C1          | CHOL      | C14       | 3000   | 45             | 47.5        | 7.5        | 50            |
| 24    | 7C1          | CHOL      | C14       | 2000   | 85             | 0           | 15         | 22            | 84    | 7C1          | CHOL      | C14       | 3000   | 45             | 45          | 10         | 30            |
| 25    | 7C1          | CHOL      | C16       | 2000   | 60             | 37.5        | 2.5        | 41            | 85    | 7C1          | CHOL      | C14       | 3000   | 45             | 42.5        | 12.5       | 30            |
| 26    | 7C1          | CHOL      | C16       | 2000   | 60             | 35          | 5          | 34            | 86    | 7C1          | CHOL      | C14       | 3000   | 45             | 40          | 15         | 31            |
| 27    | 7C1          | CHOL      | C16       | 2000   | 60             | 32.5        | 7.5        | 50            | 87    | 7C1          | CHOL      | C14       | 3000   | 45             | 37.5        | 17.5       | 37            |
| 28    | 7C1          | CHOL      | C16       | 2000   | 60             | 30          | 10         | 27            | 88    | 7C1          | CHOL      | C14       | 3000   | 45             | 35          | 20         | 34            |
| 29    | 7C1          | CHOL      | C16       | 2000   | 60             | 27.5        | 12.5       | 264           | 89    | 7C1          | CHOL      | C14       | 3000   | 45             | 32.5        | 22.5       | 71            |
| 30    | 7C1          | CHOL      | C16       | 2000   | 60             | 25          | 15         | 47            | 90    | 7C1          | CHOL      | C14       | 3000   | 45             | 30          | 25         | 32            |
| 31    | 7C1          | CHOL      | C16       | 2000   | 60             | 22.5        | 17.5       | 25            | 91    | 7C1          | CHOL      | C14       | 3000   | 85             | 12.5        | 2.5        | 33            |
| 32    | 7C1          | CHOL      | C16       | 2000   | 60             | 20          | 20         | 28            | 92    | 7C1          | CHOL      | C14       | 3000   | 85             | 10          | 5          | 297           |
| 33    | 7C1          | CHOL      | C16       | 2000   | 45             | 52.5        | 2.5        | 59            | 93    | 7C1          | CHOL      | C14       | 3000   | 85             | 7.5         | 7.5        | 28            |
| 34    | 7C1          | CHOL      | C16       | 2000   | 45             | 50          | 5          | 58            | 94    | 7C1          | CHOL      | C14       | 3000   | 85             | 5           | 10         | 30            |
| 35    | 7C1          | CHOL      | C16       | 2000   | 45             | 47.5        | 7.5        | 57            | 95    | 7C1          | CHOL      | C14       | 3000   | 85             | 2.5         | 12.5       | 35            |
| 36    | 7C1          | CHOL      | C16       | 2000   | 45             | 45          | 10         | 30            | 96    | 7C1          | CHOL      | C14       | 3000   | 85             | 0           | 15         | 29            |
| 37    | 7C1          | CHOL      | C16       | 2000   | 45             | 42.5        | 12.5       | 270           | 97    | 7C1          | CHOL      | C18       | 3000   | 60             | 37.5        | 2.5        | 33            |
| 38    | 7C1          | CHOL      | C16       | 2000   | 45             | 40          | 15         | 41            | 98    | 7C1          | CHOL      | C18       | 3000   | 60             | 35          | 5          | 43            |
| 39    | 7C1          | CHOL      | C16       | 2000   | 45             | 37.5        | 17.5       | 86            | 99    | 7C1          | CHOL      | C18       | 3000   | 60             | 32.5        | 7.5        | 52            |
| 40    | 7C1          | CHOL      | C16       | 2000   | 45             | 35          | 20         | 33            | 100   | 7C1          | CHOL      | C18       | 3000   | 60             | 30          | 10         | 40            |
| 41    | 7C1          | CHOL      | C16       | 2000   | 45             | 32.5        | 22.5       | 38            | 101   | 7C1          | CHOL      | C18       | 3000   | 60             | 27.5        | 12.5       | 34            |
| 42    | 7C1          | CHOL      | C16       | 2000   | 45             | 30          | 25         | n             | 102   | 7C1          | CHOL      | C18       | 3000   | 60             | 25          | 15         | 39            |
| 43    | 7C1          | CHOL      | C16       | 2000   | 85             | 12.5        | 2.5        | 30            | 103   | 7C1          | CHOL      | C18       | 3000   | 60             | 22.5        | 17.5       | 545           |
| 44    | 7C1          | CHOL      | C16       | 2000   | 85             | 10          | 5          | 50            | 104   | 7C1          | CHOL      | C18       | 3000   | 60             | 20          | 20         | 40            |
| 45    | 7C1          | CHOL      | C16       | 2000   | 85             | 7.5         | 7.5        | 28            | 105   | 7C1          | CHOL      | C18       | 3000   | 45             | 52.5        | 2.5        | 33            |
| 46    | 7C1          | CHOL      | C16       | 2000   | 85             | 5           | 10         | 25            | 106   | 7C1          | CHOL      | C18       | 3000   | 45             | 50          | 5          | 43            |
| 47    | 7C1          | CHOL      | C16       | 2000   | 85             | 2.5         | 12.5       | 54            | 107   | 7C1          | CHOL      | C18       | 3000   | 45             | 47.5        | 7.5        | 51            |
| 48    | 7C1          | CHOL      | C16       | 2000   | 85             | 0           | 15         | 66            | 108   | 7C1          | CHOL      | C18       | 3000   | 45             | 45          | 10         | 30            |
| 49    | 7C1          | CHOL      | C18       | 2000   | 60             | 37.5        | 2.5        | 33            | 109   | 7C1          | CHOL      | C18       | 3000   | 45             | 42.5        | 12.5       | 21            |
| 50    | 7C1          | CHOL      | C18       | 2000   | 60             | 35          | 5          | 16            | 110   | 7C1          | CHOL      | C18       | 3000   | 45             | 40          | 15         | 37            |
| 51    | 7C1          | CHOL      | C18       | 2000   | 60             | 32.5        | 7.5        | 37            | 111   | 7C1          | CHOL      | C18       | 3000   | 45             | 37.5        | 17.5       | 32            |
| 52    | 7C1          | CHOL      | C18       | 2000   | 60             | 30          | 10         | 46            | 112   | 7C1          | CHOL      | C18       | 3000   | 45             | 35          | 20         | 22            |
| 53    | 7C1          | CHOL      | C18       | 2000   | 60             | 27.5        | 12.5       | 23            | 113   | 7C1          | CHOL      | C18       | 3000   | 45             | 32.5        | 22.5       | 29            |
| 54    | 7C1          | CHOL      | C18       | 2000   | 60             | 25          | 15         | 43            | 114   | 7C1          | CHOL      | C18       | 3000   | 45             | 30          | 25         | 30            |
| 55    | 7C1          | CHOL      | C18       | 2000   | 60             | 22.5        | 17.5       | 63            | 115   | 7C1          | CHOL      | C18       | 3000   | 85             | 12.5        | 2.5        | 81            |
| 56    | 7C1          | CHOL      | C18       | 2000   | 60             | 20          | 20         | 47            | 116   | 7C1          | CHOL      | C18       | 3000   | 85             | 10          | 5          | 125           |
| 57    | 7C1          | CHOL      | C18       | 2000   | 45             | 52.5        | 2.5        | 105           | 117   | 7C1          | CHOL      | C18       | 3000   | 85             | 7.5         | 7.5        | 82            |
| 58    | 7C1          | CHOL      | C18       | 2000   | 45             | 50          | 5          | 33            | 118   | 7C1          | CHOL      | C18       | 3000   | 85             | 5           | 10         | 34            |
| 59    | 7C1          | CHOL      | C18       | 2000   | 45             | 47.5        | 7.5        | 54            | 119   | 7C1          | CHOL      | C18       | 3000   | 85             | 2.5         | 12.5       | 58            |
| 60    | 7C1          | CHOL      | C18       | 2000   | 45             | 45          | 10         | 49            | 120   | 7C1          | CHOL      | C18       | 3000   | 85             | 0           | 15         | 44            |

**Figure S5.** (a) Total ddPCR barcode counts for library 2 – equal to the area of the circle - were used to determine the overall biodistribution from the LNP screens previously described across multiple organs from wild-type and Cav1<sup>-/-</sup> mice. (b) The total ddPCR counts were determined in different cell-types from the liver, (c) lung and (d) kidney. (e) Within the liver cell-types, normalized nanoparticle biodistribution demonstrates that Kupffer cells in Cav1<sup>-/-</sup> uptake less nucleic acids when compared to Kupffer cells from wild-type mice. \*p<0.05 2-way ANOVA. (f) Combined sequencing data and ddPCR results shows the absolute delivery of 115 nanoparticles for each LNP in the liver in wild type (blue) and Cav1<sup>-/-</sup> (red) mice, from library 1, in Kupffer cells, liver endothelial cells, and hepatocytes.

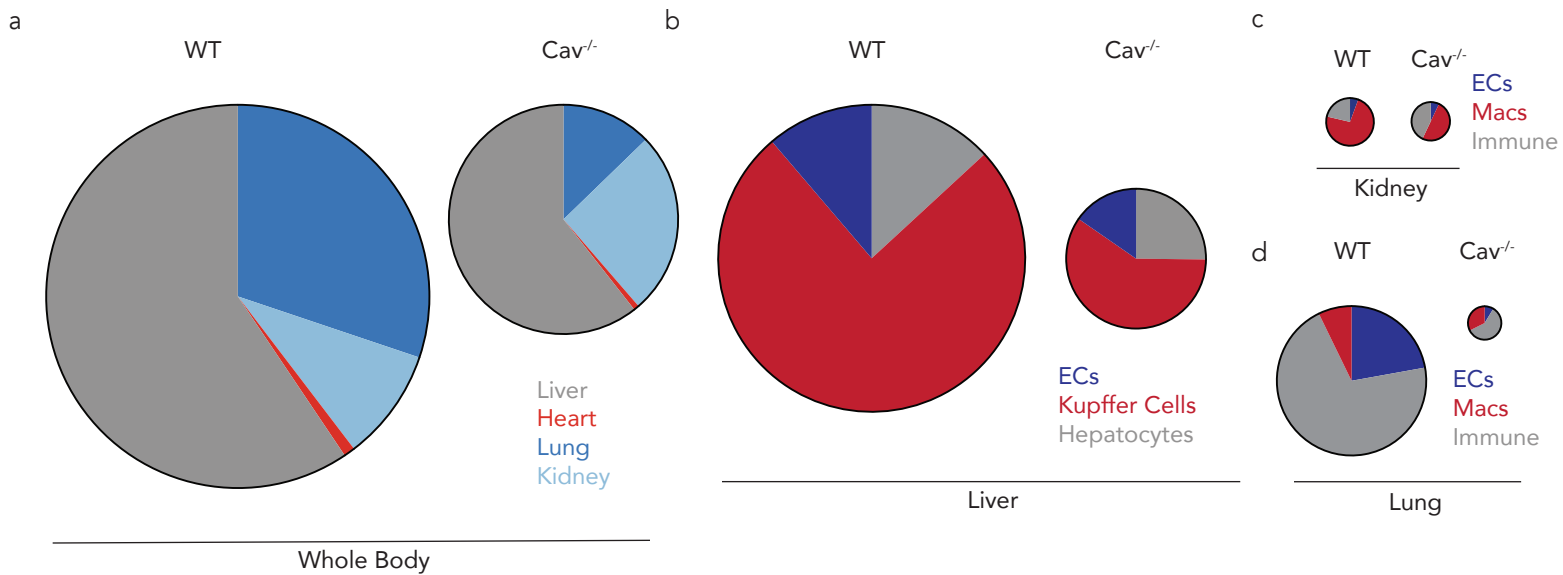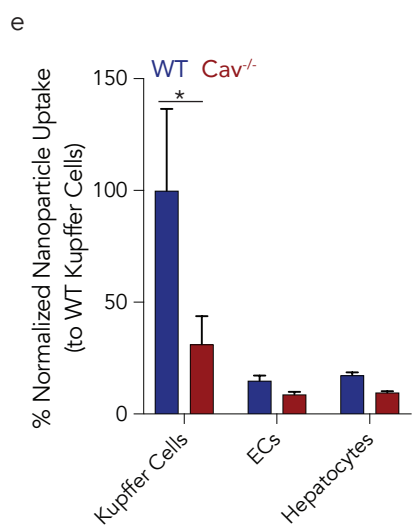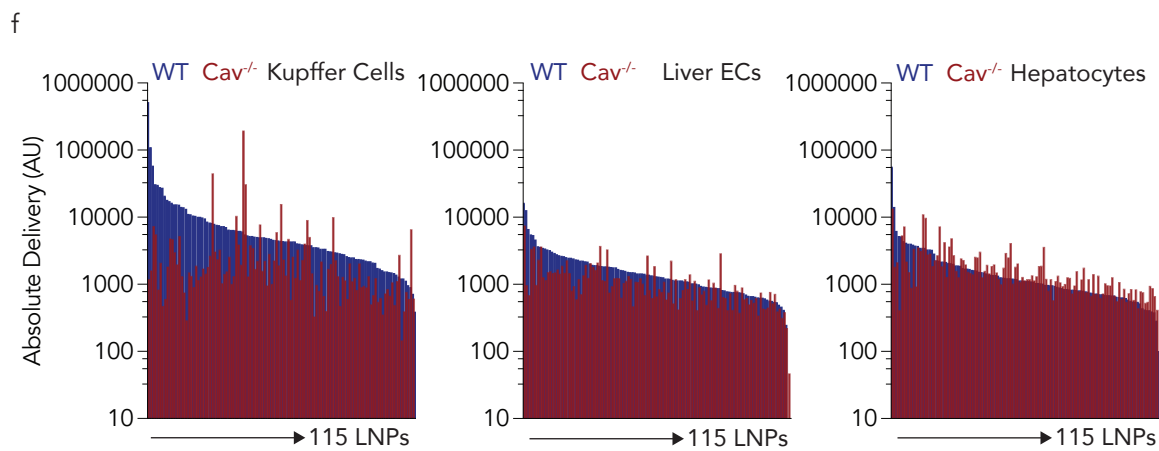

**Figure S6. (a)** Normalized nanoparticle biodistribution across two screens (226 LNPs) in liver, lung, heart, and kidney endothelial cells. **(b)** QUANT demonstrates that endothelial cells in Cav1<sup>-/-</sup> uptake less QUANT barcodes than endothelial cells in wild-type mice. \*p<0.05, \*\*\*p<0.001 1 tailed t-test. **(c)** Combined sequencing data and ddPCR results for each LNP in lung endothelial cells in wild type (blue) and Cav1<sup>-/-</sup> (red) mice from screen 1 and screen 2 in lung, **(d)** heart, and **(e)** kidney endothelial cells.

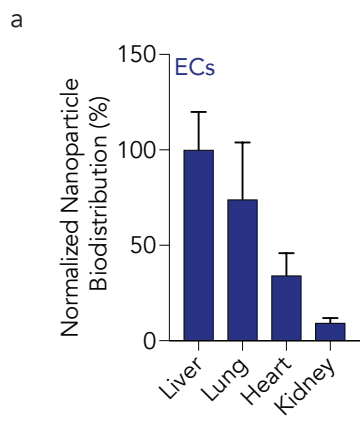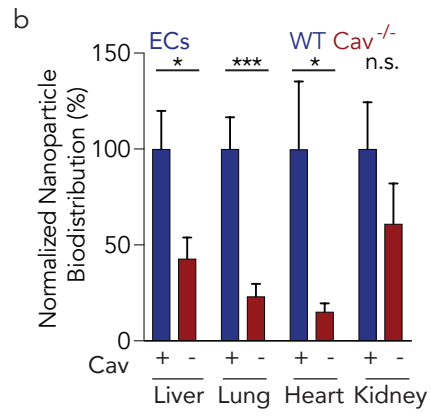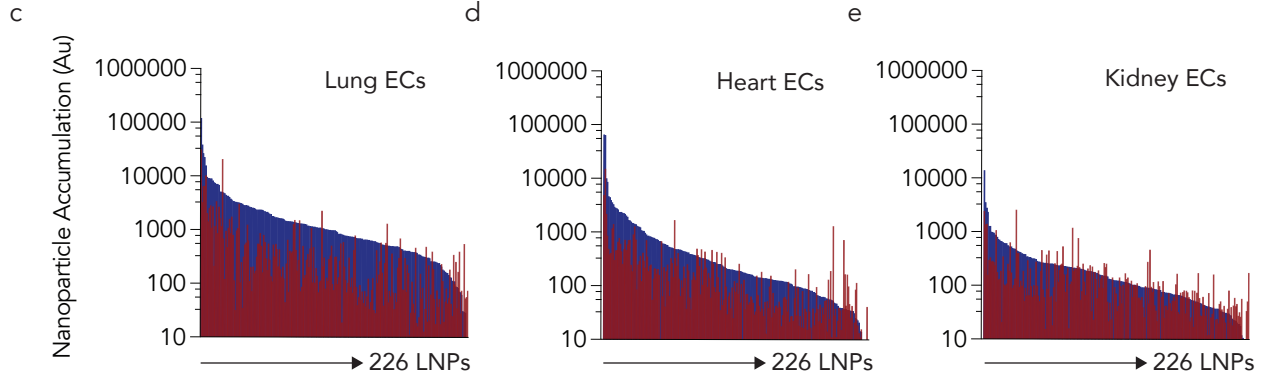

Supplement: NIHMS991269-supplement-Supplemental_Figures.pdf [file NIHMS991269-supplement-Supplemental_Figures.pdf]
